# Supplementary material for: H/F substituted perovskite compounds with above-room-temperature ferroelasticity: [(CH3)4P][Cd(SCN)3] and [(CH3)3PCH2F][Cd(SCN)3]
Source: Royal Society of Chemistry journal article supplement (doi:10.1039/c9cc03857d), 2019-01-01
Supplement: c9cc03857d1.pdf [file c9cc03857d1.pdf]

## H/F substituted perovskite compounds with above-room-temperature ferroelasticity: [[CH<sub>3</sub>]<sub>4</sub>P][Cd(SCN)<sub>3</sub>] and [[CH<sub>3</sub>]<sub>3</sub>PCH<sub>2</sub>F][Cd(SCN)<sub>3</sub>]

Ying-Jie Cao, Lin Zhou, Ping-Ping Shi, Qiong Ye\* and Da-Wei Fu\*

### Syntheses

All used experimental reagents were of analytical grade without any further purification. Tetramethylphosphonium chloride was commercially available. The synthesis method of fluoromethyl-trimethyl-phosphonium bromide (Me<sub>3</sub>PCH<sub>2</sub>F·Br): dehydrated acetonitrile (50 mL) was added into a dry flask under nitrogen at 0°C. Trimethylphosphine (4 mL, 40 mmol) was added to this solution via a syringe firstly. Then fluorobromomethane (3 mL, 47 mmol) pre-cooled to 0°C was dropped into the solution in an ice bath. The mixed solution was heated to 40°C and stirred for 5 h. Reaction mixture was cooled down to room temperature for about 10 min. Then the solvent was removed under vacuum, and the residue was dried to obtain Me<sub>3</sub>PCH<sub>2</sub>F·Br as a white solid. The mixture could be recrystallized from ethyl acetate and ethanol with a yield of about 60% based on trimethylphosphine. The product was stable except deliquescent, so the recrystallized product was quickly transferred to a reagent bottle and sealed after processing. <sup>1</sup>H NMR (DMSO): δ 5.44-5.52 (dd, H), δ 3.34 (s, 1.25H), δ 2.50 (s, 1.89H), δ 1.95-1.98 (d, 4.49H). <sup>13</sup>C NMR (DMSO): δ 78.07 (dd), δ 39.8 (m, 20.61 C), δ 4.88 (d, 3.27 C). <sup>19</sup>F NMR (DMSO): δ -173.12 (s). <sup>31</sup>P NMR (DMSO): δ 27.73 (m) (Figure S8). The mass spectrum confirmed the phase purity of Me<sub>3</sub>PCH<sub>2</sub>F<sup>+</sup> (Figure S9).

Synthesis of **1** and **2**: Colourless strip crystals of [[CH<sub>3</sub>]<sub>4</sub>P][Cd(SCN)<sub>3</sub>] (**1**) and [Me<sub>3</sub>PCH<sub>2</sub>F][Cd(SCN)<sub>3</sub>] (**2**) were obtained by slowly evaporating aqueous solutions (about 60 mL) containing cadmium nitrate tetrahydrate (0.02 mol), sodium rhodanate (0.06 mol) and tetramethylphosphonium chloride (0.02 mol for **1**), Me<sub>3</sub>PCH<sub>2</sub>F·Br (0.02 mol for **2**), at room temperature for few days respectively. Compound **1** and **2** was verified by IR spectroscopy using a Shimadzu model IR-60 spectrometer (Figure S1) and PXRD patterns, which confirmed the phase purity of **1** and **2** (Figure S2). The peak at 2900-3000 cm<sup>-1</sup> is attributed to the stretching vibration of C-H, the peak at 1300-1400 cm<sup>-1</sup> is attributed to in-plane bending vibration peak of C-H and the peak at 650-1000 cm<sup>-1</sup> may be due to out-plane bending vibration peak of C-H. The peak near 2000 cm<sup>-1</sup> is the characteristic peak of C≡N. The infrared characteristic peak of the C-F bond from organic cation is located at about 1050 cm<sup>-1</sup>.

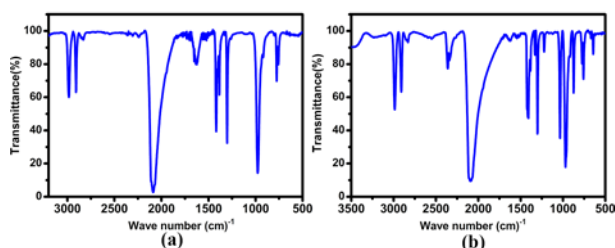

Fig. S1 IR spectrums of **1** (a) and **2** (b) measured on a KBr-diluted pellet at room temperature.

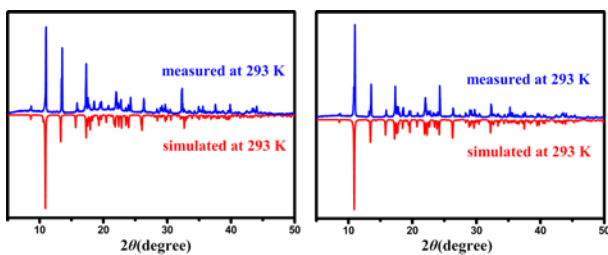

Fig. S2 Powder XRD patterns of **1** and **2** at 293 K.

### Single-Crystal X-ray Crystallography

Data of variable-temperature X-ray diffraction of compound **1** and **2** was collected on a Rigaku Saturn 724 diffractometer with Mo K $\alpha$  radiation ( $\lambda = 0.71073 \text{ \AA}$ ) at different temperatures (293 K, 338 K or 333 K). The Crystal-Clear software package (Rigaku, 2005) was used to perform data reduction and multiscan absorption correction. Crystal structures were solved with direct method, and then refined by the SHELXLTL software package (SHELX-14) using full-matrix least-squares refinements on  $F^2$ . Non-hydrogen atoms were refined anisotropically with all H atoms being placed at ideal positions. The molecular structures and the

packing views were drawn with DIAMOND (Brandenburg and Putz, 2005). Crystal data and structure refinement for **1** and **2** are given in Table S1.

## Powder X-ray Diffraction

For compounds **1** and **2**, powder X-ray diffraction (PXRD) measurements on a PANalytical X'Pert PRO X-ray diffractometer were performed at 293 K. Diffraction patterns were recorded in the  $2\theta$  range 5–50° with a step size of 0.02°.

## Thermal Measurements

The differential scanning calorimetry (DSC) data of **1** and **2** was recorded on a PerkinElmer Diamond DSC instrument at 10 K min<sup>-1</sup> by heating/cooling under a nitrogen atmosphere in aluminum crucibles. The samples (6.7 mg for **1** and 7.2 mg for **2**) were placed in aluminium crucible at atmosphere.

## Dielectric Constant Measurements

Crystalline powdered samples of **1** and **2** deposited with carbon conductive glue painted on both sides was used in dielectric studies. The complex dielectric permittivity  $\epsilon$  ( $\epsilon = \epsilon' - i\epsilon''$ , where  $\epsilon'$  and  $\epsilon''$  are the real part and imaginary part, respectively) was measured on an impedance analyzer (TH2828A) in the frequency range from 50 kHz to 1 MHz, with an applied ac voltage at 1 V.

## Optical measurements

Aqueous saturated solutions (100  $\mu$ L) of **1** and **2** were dropped onto a prepared indium tin oxide (ITO)-coated glass respectively, and thin films were obtained by the situ growth on a hotplate (Linkam THMSE 600 cooling/heating stage) at 343 K for 10 min. Optical observations were carried out by using an Eclipse E600 POL polarizing microscope (Nikon) equipped.

**Table S1.** Crystal data, data collection and reduction parameter of crystals of **1** and **2**.

|                                                        | 293K                                                            | 338K                                          | 293K                                                             | 333K                                          |
|--------------------------------------------------------|-----------------------------------------------------------------|-----------------------------------------------|------------------------------------------------------------------|-----------------------------------------------|
| Chemical Formula                                       | C <sub>7</sub> H <sub>12</sub> CdS <sub>3</sub> PN <sub>3</sub> |                                               | C <sub>7</sub> H <sub>11</sub> CdFN <sub>3</sub> PS <sub>3</sub> |                                               |
| Formula weight                                         | 377.76                                                          |                                               | 395.74                                                           |                                               |
| Crystal system                                         | Monoclinic                                                      | Orthorhombic                                  | Monoclinic                                                       | Orthorhombic                                  |
| Space group                                            | <i>P</i> 2 <sub>1</sub> / <i>c</i>                              | <i>Pm</i> <i>cn</i>                           | <i>P</i> 2 <sub>1</sub> / <i>c</i>                               | <i>Pm</i> <i>cn</i>                           |
| <i>a</i> , Å                                           | 10.287(2)                                                       | 10.2216(5)                                    | 10.3715 (3)                                                      | 10.3487 (4)                                   |
| <i>b</i> , Å                                           | 13.299(3)                                                       | 13.3718(7)                                    | 13.1559 (4)                                                      | 13.2129 (4)                                   |
| <i>c</i> , Å                                           | 10.788(2)                                                       | 10.6974(5)                                    | 10.7808 (3)                                                      | 10.7451 (4)                                   |
| $\alpha$ , deg                                         | 90                                                              | 90                                            | 90                                                               | 90                                            |
| $\beta$ , deg                                          | 95.07(3)                                                        | 90                                            | 97.025 (3)                                                       | 90                                            |
| $\gamma$ , deg                                         | 90                                                              | 90                                            | 90                                                               | 90                                            |
| <i>V</i> , Å <sup>3</sup>                              | 1470.1(5)                                                       | 1462.13(13)                                   | 1459.96 (7)                                                      | 1469.25 (9)                                   |
| <i>Z</i>                                               | 4                                                               | 4                                             | 4                                                                | 4                                             |
| <i>F</i> (000)                                         | 744.0                                                           | 744.0                                         | 776                                                              | 772                                           |
| Radiation (Mo K $\alpha$ )                             | 0.71073                                                         | 0.71073                                       | 0.71073                                                          | 0.71073                                       |
| 2 $\theta$ range for data collection, °                | 3.0–27.5                                                        | 3.6–29.1                                      | 3.0–31.7                                                         | 2.5–27.5                                      |
| Reflections measured                                   | 10056                                                           | 8781                                          | 11960                                                            | 9907                                          |
| Reflections independent                                | 3333                                                            | 1962                                          | 3809                                                             | 2150                                          |
| Reflections used                                       | 2116                                                            | 1528                                          | 3241                                                             | 1675                                          |
| $\mu$ , mm <sup>-1</sup>                               | 2                                                               | 2                                             | 2.02                                                             | 2.01                                          |
| Goodness-of-fit on <i>F</i> <sup>2</sup>               | 1.06                                                            | 1.07                                          | 1.083                                                            | 1.01                                          |
| Final R indexes [ <i>I</i> >= 2 $\sigma$ ( <i>I</i> )] | R <sub>1</sub> =0.080, wR <sub>2</sub> =0.247                   | R <sub>1</sub> =0.080, wR <sub>2</sub> =0.271 | R <sub>1</sub> =0.072, wR <sub>2</sub> =0.027                    | R <sub>1</sub> =0.105, wR <sub>2</sub> =0.462 |

**Table S2.** The key bond distances and angles of **1** at 293 K and 338 K

|      |                         |            |                           |            |
|------|-------------------------|------------|---------------------------|------------|
|      | N1—Cd1                  | 2.315 (9)  | N2—Cd1                    | 2.439 (10) |
|      | N3—Cd1                  | 2.327 (10) | Cd1—S3                    | 2.700 (3)  |
|      | Cd1—S1                  | 2.768 (3)  | Cd1—S2                    | 2.726 (3)  |
| 293K | N3—C3—S2 <sup>i</sup>   | 177.9 (11) | N1 <sup>i</sup> —C1—S1    | 178.2 (11) |
|      | N2 <sup>ii</sup> —C2—S3 | 170.5 (11) | C3 <sup>iii</sup> —S2—Cd1 | 97.5 (4)   |
|      | C2—S3—Cd1               | 101.5 (4)  | C1—S1—Cd1                 | 95.9 (3)   |

|                                                                    |                          |            |                           |           |
|--------------------------------------------------------------------|--------------------------|------------|---------------------------|-----------|
|                                                                    | C2 <sup>i</sup> —N2—Cd1  | 132.0 (10) | C1 <sup>ii</sup> —N1—Cd1  | 154.0 (8) |
|                                                                    | C3—N3—Cd1                | 149.6 (9)  |                           |           |
| Symmetry codes: (i) $x, -y+1/2, z+1/2$ ; (ii) $x, -y+1/2, z-1/2$ . |                          |            |                           |           |
| 338 K                                                              | N1—Cd1                   | 2.319 (10) | S2—Cd1                    | 2.713 (3) |
|                                                                    | Cd1—S1                   | 2.762 (3)  | Cd1—N2 <sup>iii</sup>     | 2.378 (9) |
|                                                                    | N2—Cd1                   | 2.378 (9)  | Cd1—S2 <sup>iii</sup>     | 2.713 (3) |
|                                                                    | N2—C2—S2 <sup>i</sup>    | 174.5 (9)  | N1 <sup>ii</sup> —C1—S1   | 178.2 (9) |
|                                                                    | C2—N2—Cd1                | 140.2 (10) | C1 <sup>iii</sup> —N1—Cd1 | 152.7 (8) |
|                                                                    | C2 <sup>iv</sup> —S2—Cd1 | 99.1 (3)   | C1—S1—Cd1                 | 95.2 (4)  |

Symmetry codes: (i)  $x, -y+1/2, z+1/2$ ; (ii)  $-x+1/2, -y+1/2, z+1/2$ ; (iii)  $-x+1/2, y, z$ .

**Table S3.** The key bond distances and angles of **2** at 293 K and 333 K

|      |                          |           |                         |             |
|------|--------------------------|-----------|-------------------------|-------------|
| 293K | Cd1—N2 <sup>i</sup>      | 2.293 (6) | Cd1—S1                  | 2.7195 (19) |
|      | Cd1—N1                   | 2.343 (7) | Cd1—S3                  | 2.7363 (19) |
|      | Cd1—N3                   | 2.424 (7) | Cd1—S2                  | 2.713 (2)   |
|      | N3—C6—S1 <sup>ii</sup>   | 171.3 (7) | N1 <sup>i</sup> —C7—S2  | 178.1 (7)   |
|      | N2—C5—S3                 | 179.6 (7) | C5—S3—Cd1               | 96.3 (2)    |
|      | C6 <sup>i</sup> —S1—Cd1  | 102.5 (2) | C7—S2—Cd1               | 98.0 (2)    |
|      | C6—N3—Cd1                | 131.1 (7) | C5—N2—Cd1 <sup>ii</sup> | 154.5 (5)   |
|      | C7 <sup>ii</sup> —N1—Cd1 | 149.9 (6) |                         |             |

Symmetry codes: (i)  $x, -y+1/2, z-1/2$ ; (ii)  $x, -y+1/2, z+1/2$ .

|      |                          |            |                           |             |
|------|--------------------------|------------|---------------------------|-------------|
| 333K | Cd1—N1                   | 2.291 (4)  | Cd1—S1 <sup>i</sup>       | 2.7346 (13) |
|      | Cd1—N2 <sup>i</sup>      | 2.362 (5)  | Cd1—S1                    | 2.7346 (13) |
|      | Cd1—N2                   | 2.362 (5)  | Cd1—S2                    | 2.7414 (13) |
|      | N1—C5—S2 <sup>ii</sup>   | 179.5 (4)  | N2—C4—S1 <sup>iii</sup>   | 175.5 (4)   |
|      | C5 <sup>ii</sup> —S2—Cd1 | 96.39 (16) | C4 <sup>iii</sup> —S1—Cd1 | 99.55 (15)  |
|      | C5—N1—Cd1                | 154.7 (4)  | C4—N2—Cd1                 | 139.1 (4)   |

Symmetry codes: (i)  $-x+1/2, y, z$ ; (ii)  $-x+1/2, -y+1/2, z-1/2$ ; (iii)  $x, -y+1/2, z+1/2$ .

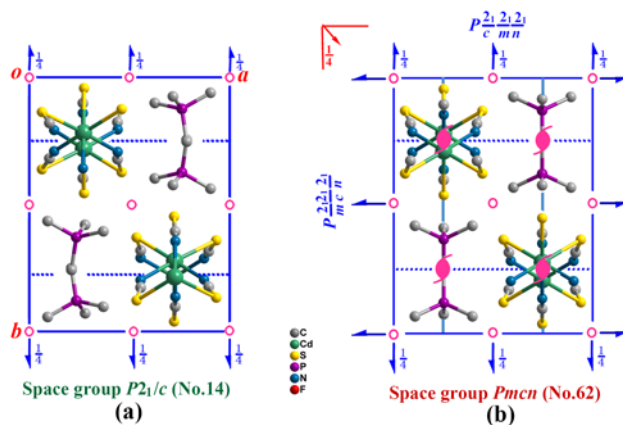

**Fig. S3** The unit cell packing and spatially symmetric operations change of **1** from RTP (a) to HTP (b)

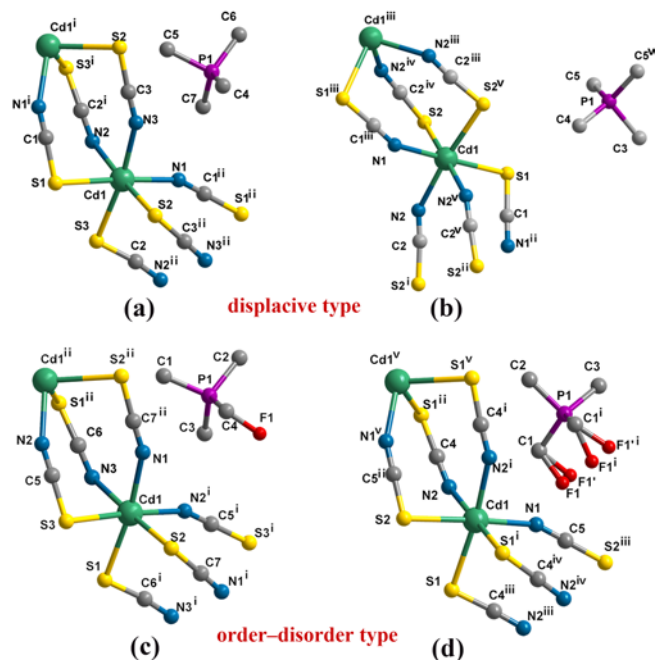

**Fig. S4** Molecular structures of **1** shown at (a) 293 K and (b) 338 K and of **2** shown at (c) 293 K and (d) 333 K. All H atoms omitted for clarity. [Symmetry codes: (i)  $x, -y+1/2, z+1/2$ ; (ii)  $x, -y+1/2, z-1/2$ . (b) (i)  $x, -y+1/2, z+1/2$ ; (ii)  $-x+1/2, -y+1/2, z+1/2$ ; (iii)  $-x+1/2, -y+1/2, z-1/2$ ; (iv)  $x, -y+1/2, z-1/2$ ; (v)  $-x+1/2, y, z$ . (c) (i)  $x, -y+1/2, z-1/2$ ; (ii)  $x, -y+1/2, z+1/2$ . (d) (i)  $-x+1/2, y, z$ ; (ii)  $-x+1/2, -y+1/2, z+1/2$ ; (iii)  $x, -y+1/2, z-1/2$ ; (iv)  $-x+1/2, -y+1/2, z-1/2$ ; (v)  $x, -y+1/2, z+1/2$ .]

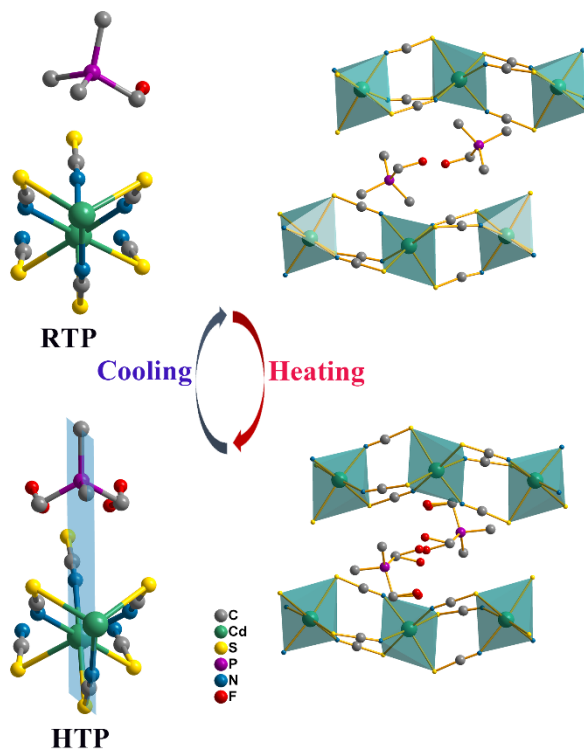

**Fig. S5** Structures of **2** in the HTP (293 K) and HTP (333 K).

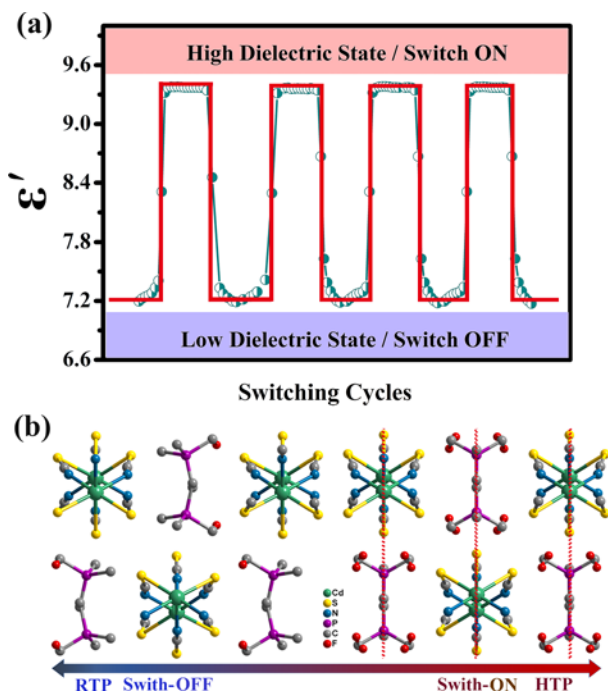

**Fig. S6** (a) The recoverable switching dielectric effects of **2** at 1 MHz. (b) Schematic diagram for the generation of molecular structure change in **2** during the switching process (red dotted line indicates mirror)

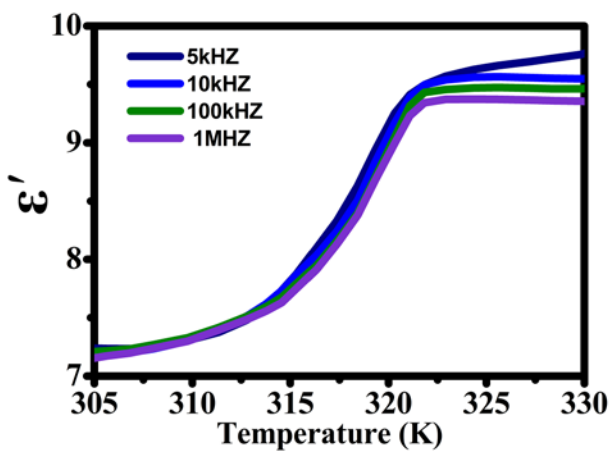

**Fig. S7** The  $\epsilon'$  of **2** at frequencies from 5 kHz to 1000 kHz upon cooling.

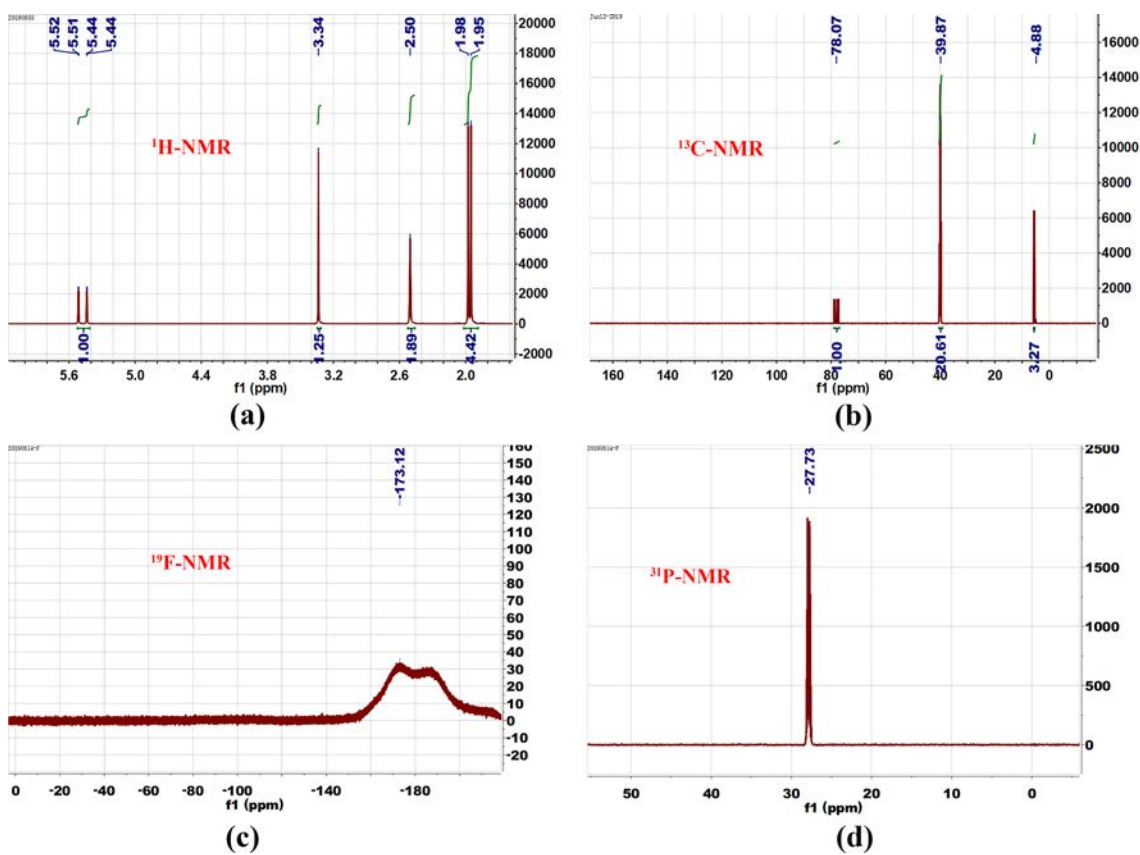

Fig. S8 The  $^1\text{H}$ (a),  $^{13}\text{C}$ (b),  $^{19}\text{F}$ (c) and  $^{31}\text{P}$ (d) NMR of  $\text{Me}_3\text{PCH}_2\text{F}\cdot\text{Br}$

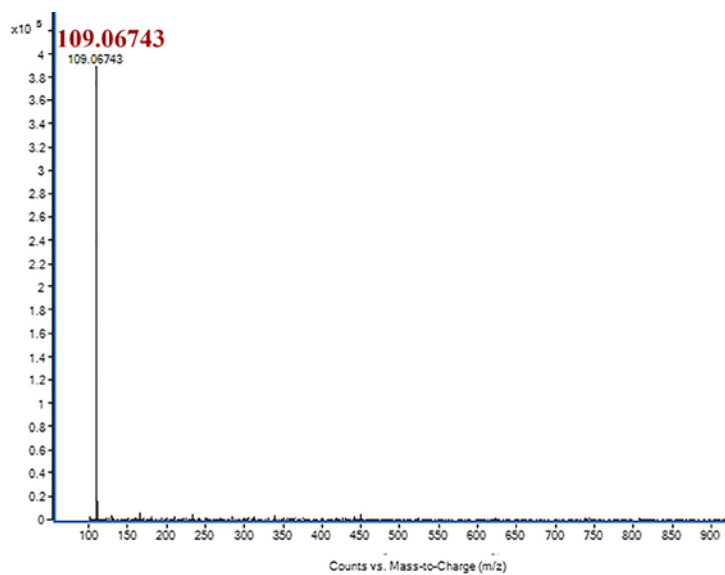

Fig. S9 The mass spectrum of  $\text{Me}_3\text{PCH}_2\text{F}^+$
